# Supplementary material for: Spin-crossover iron(ii) long-chain complex with slow spin equilibrium at low temperatures
Source: Royal Society of Chemistry journal article supplement (doi:10.1039/d1dt01378e), 2021-01-01
Supplement: d1dt01378e1.pdf [file d1dt01378e1.pdf]

Supporting Information  
for

**Spin-crossover iron(II) long-chain complex with slow spin equilibrium  
at low temperature**

Qi Zhao, Jin-Peng Xue, Zhi-Kun Liu, Zi-Shuo Yao,\* and Jun Tao\*

Key Laboratory of Cluster Science of Ministry of Education, School of Chemistry and  
Chemical Engineering, Liangxiang Campus, Beijing Institute of Technology, Beijing 102488,  
People's Republic of China.

E-mail: taojun@bit.edu.cn (J. Tao), zishuoyao@bit.edu.cn (Z.-S. Yao)

**Table S1.** Crystal data and structural refinements for complex **1**.

| [Fe(H <sub>2</sub> Bpz <sub>2</sub> ) <sub>2</sub> (C <sub>9</sub> bpy)] |                                                                                 |
|--------------------------------------------------------------------------|---------------------------------------------------------------------------------|
| <i>T</i> / K                                                             | 293                                                                             |
| Formula                                                                  | C <sub>80</sub> H <sub>120</sub> B <sub>4</sub> N <sub>20</sub> Fe <sub>2</sub> |
| MW                                                                       | 1516.88                                                                         |
| Crystal system                                                           | Monoclinic                                                                      |
| Space group                                                              | <i>P</i> 2 <sub>1</sub> / <i>n</i>                                              |
| <i>a</i> / Å                                                             | 10.5280(10)                                                                     |
| <i>b</i> / Å                                                             | 22.6959(19)                                                                     |
| <i>c</i> / Å                                                             | 35.720(3)                                                                       |
| <i>α</i> / deg                                                           | 90                                                                              |
| <i>β</i> / deg                                                           | 92.677(7)                                                                       |
| <i>γ</i> / deg                                                           | 90                                                                              |
| <i>V</i> / Å <sup>3</sup>                                                | 8525.6(12)                                                                      |
| <i>Z</i>                                                                 | 8                                                                               |
| <i>D</i> <sub>calc</sub> / g/cm <sup>3</sup>                             | 1.1786                                                                          |
| <i>μ</i> / mm <sup>-1</sup>                                              | 0.394                                                                           |
| Goodness-of-fit on <i>F</i> <sup>2</sup>                                 | 1.0515                                                                          |
| <i>F</i> (000)                                                           | 3235                                                                            |
| <i>R</i> <sub>1</sub> [ <i>I</i> ≥ 2σ( <i>I</i> )]                       | 0.0787                                                                          |
| <i>wR</i> <sub>2</sub> [all data]                                        | 0.2067                                                                          |
| CCDC no.                                                                 | 2040605                                                                         |

**Table S2.** Selected bond lengths for complex **1** at 293 K.

| Complex <b>1</b> |          |
|------------------|----------|
| Fe1–N1           | 2.205(4) |
| Fe1–N4           | 2.147(4) |
| Fe1–N5           | 2.194(4) |
| Fe1–N8           | 2.162(4) |
| Fe1–N9           | 2.205(4) |
| Fe1–N10          | 2.215(4) |
| Fe2–N11          | 2.145(4) |
| Fe2–N14          | 2.206(4) |
| Fe2–N15          | 2.156(4) |
| Fe2–N18          | 2.190(4) |
| Fe2–N19          | 2.189(4) |
| Fe2–N20          | 2.221(4) |

**Table S3.** Rate Constants  $k_{\text{HL}}(T)$  of annealing test at different temperatures.

| $T / \text{K}$ | $k_{\text{HL}}(T)$ |
|----------------|--------------------|
| 50             | 8.795E-7           |
| 55             | 2.749E-5           |
| 60             | 3.939E-5           |
| 65             | 6.300E-4           |

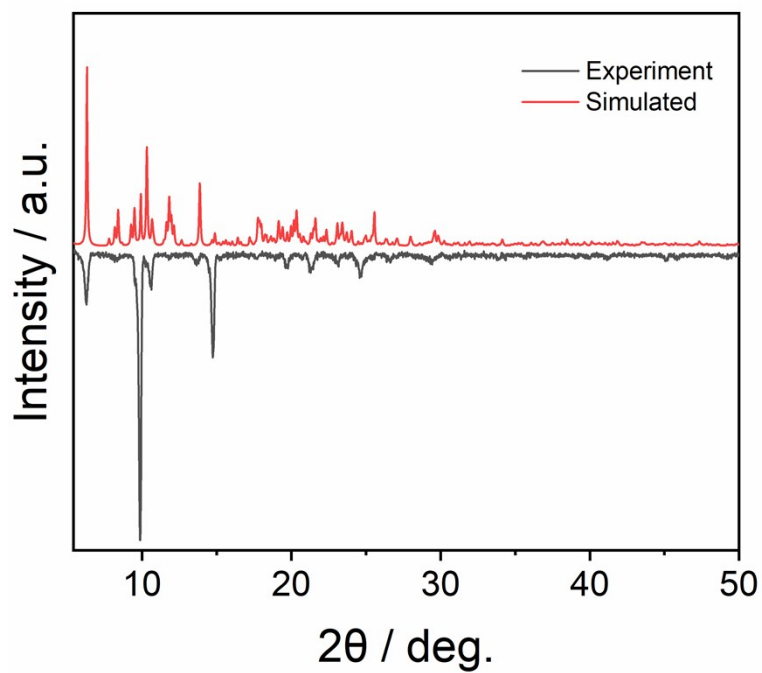

**Figure S1.** Comparison of the PXR D patterns of **1** measured from polycrystalline sample and simulated based on single-crystal structure.

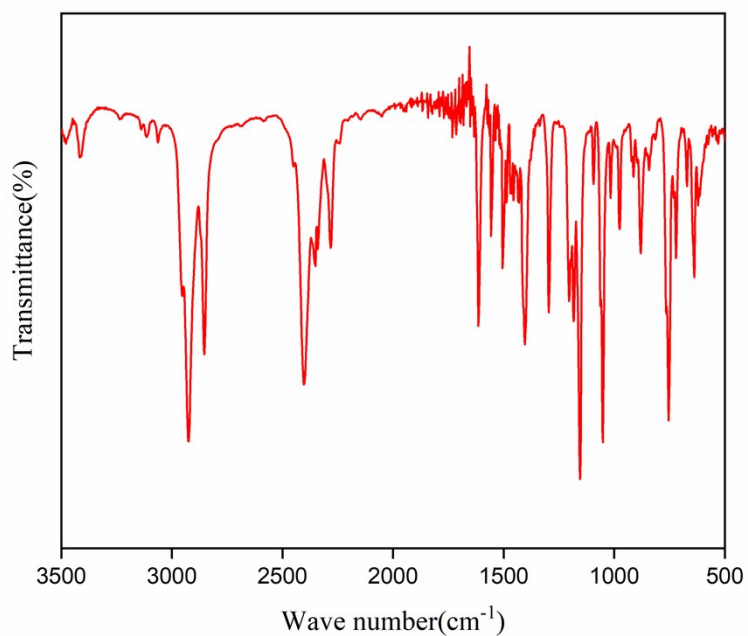

**Figure S2.** IR spectra of complex **1**. In the FIT-IR spectrum, the characteristic peaks of  $\text{H}_2\text{Bpz}_2^-$  group is around 2400  $\text{cm}^{-1}$  and 1153  $\text{cm}^{-1}$ . The peaks at 2926  $\text{cm}^{-1}$  denotes the vibration of -CH groups.

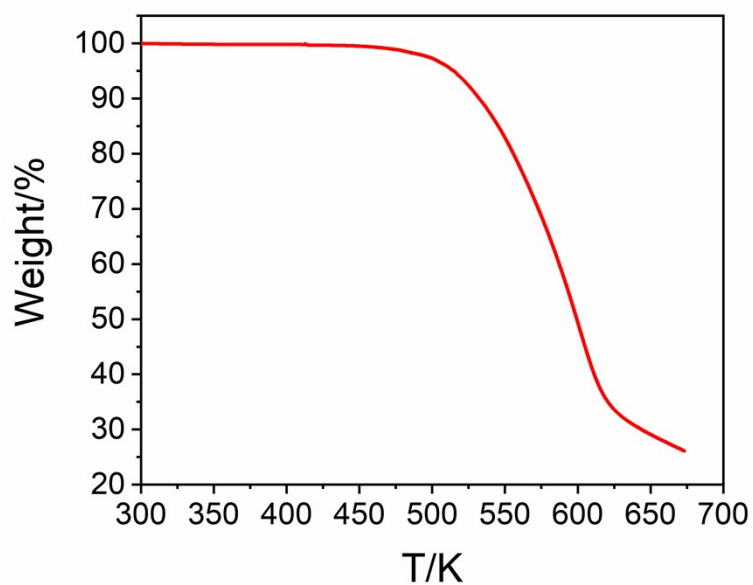

**Figure S3.** Thermogravimetric data of complex **1**. The thermogravimetric data shows that there is no mass loss at the beginning of heating compound **1**, which confirms that the compound **1** does not contain solvent molecules, and compound **1** will not decompose until heated at 463 K.

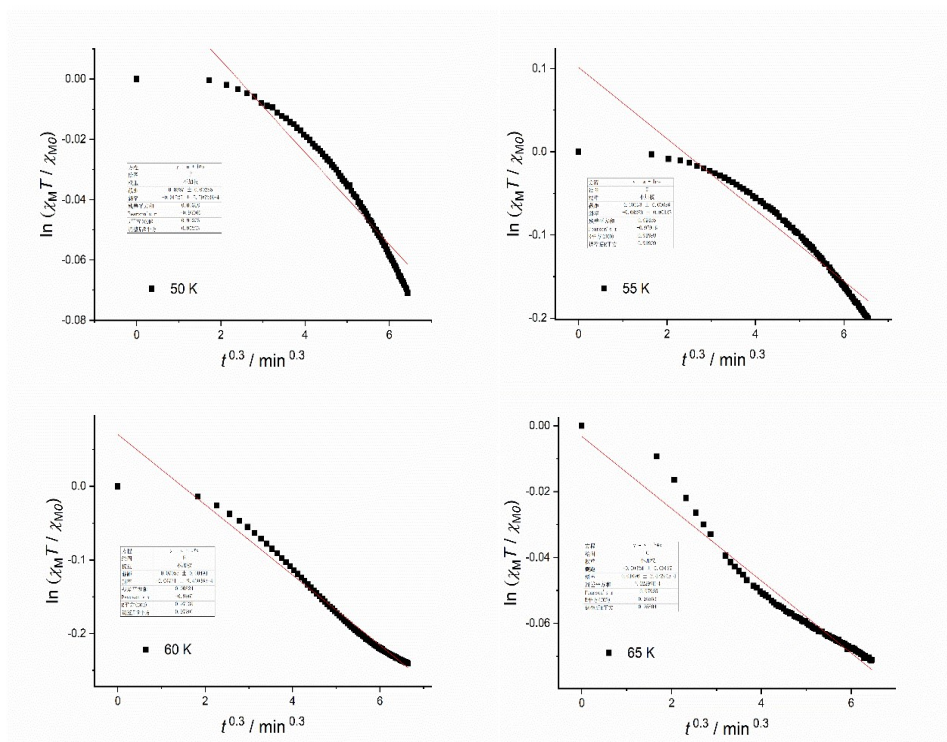

**Figure S4.** Fitting data of rate constants  $k_{HL}(T)$  at different temperatures.
